# Supplementary material
Source: publisher site journal article supplement (https://www.spandidos-publications.com/766/downloadSupplementary)
Supplement: Supplementary file 1 [file downloadSupplementary]

Table SI. List of differentially expressed circRNAs identified in the GSE101124 dataset<sup>a</sup>.

| circRNA ID           | Position                 | circRNA type | Strand | Genomic length | Spliced length | Best transcript | Gene symbol | Type of regulation |
|----------------------|--------------------------|--------------|--------|----------------|----------------|-----------------|-------------|--------------------|
| hsa_circ_00432<br>78 | chr17:35797838-35800763  | Exonic       | +      | 2925           | 250            | NM_001488       | TADA2A      | Downregulation     |
| hsa_circ_00009<br>77 | chr2:10784445-10808849   | Exonic       | -      | 24404          | 562            | NM_024894       | NOL10       | Downregulation     |
| hsa_circ_00062<br>20 | chr17:35800605-35800763  | Exonic       | +      | 158            | 158            | NM_001488       | TADA2A      | Downregulation     |
| hsa_circ_00016<br>66 | chr6:170626457-170639638 | Exonic       | +      | 13181          | 2038           | NM_032448       | FAM120B     | Downregulation     |
| hsa_circ_00651<br>73 | chr3:47155365-47168153   | Exonic       | -      | 12788          | 4644           | NM_014159       | SETD2       | Downregulation     |
| hsa_circ_00089<br>11 | chr2:27830711-27830906   | Exonic       | +      | 195            | 195            | NM_032434       | ZNF512      | Downregulation     |
| hsa_circ_00014<br>55 | chr4:164514761-164515093 | Intronic     | +      | 332            | 332            | NM_001166373    | MARCH1      | Downregulation     |

|                      |                           |          |   |       |       |              |           |                |
|----------------------|---------------------------|----------|---|-------|-------|--------------|-----------|----------------|
| hsa_circ_00032<br>66 | chr3:66501982-66512933    | Exonic   | - | 10951 | 147   | NM_015541    | LRIG1     | Downregulation |
| hsa_circ_00059<br>27 | chr8:42259305-42260979    | Exonic   | + | 1674  | 379   | NM_001135694 | VDAC3     | Downregulation |
| hsa_circ_00189<br>09 | chr10:76970891-76982160   | Exonic   | + | 11269 | 938   | NM_001184783 | VDAC2     | Downregulation |
| hsa_circ_00083<br>03 | chr8:97318671-97343323    | Exonic   | + | 24652 | 418   | NM_014754    | PTDSS1    | Downregulation |
| hsa_circ_00047<br>81 | chr14:71413631-71435827   | Exonic   | + | 22196 | 451   | NM_014982    | PCNX      | Downregulation |
| hsa_circ_00200<br>80 | chr10:116590610-116608496 | Exonic   | + | 17886 | 1758  | NM_020940    | FAM160B1  | Downregulation |
| hsa_circ_00003<br>76 | chr12:11199618-11248400   | Exonic   | - | 48782 | 48782 | NR_037918    | PRH1-PRR4 | Downregulation |
| hsa_circ_00043<br>69 | chrX:149983334-149984551  | Exonic   | - | 1217  | 159   | NM_001242614 | CD99L2    | Downregulation |
| hsa_circ_00923       | chr11:8706439-8707219     | Intronic | + | 780   | 780   | NM_000990    | RPL27A    | Downregulation |

|                      |                          |          |   |       |     |              |        |                |
|----------------------|--------------------------|----------|---|-------|-----|--------------|--------|----------------|
| 42                   |                          |          |   |       |     |              |        |                |
| hsa_circ_00400<br>39 | chr16:69279504-69318147  | Exonic   | + | 38643 | 765 | NM_006750    | SNTB2  | Downregulation |
| hsa_circ_00052<br>65 | chr20:2928627-2945848    | Exonic   | + | 17221 | 554 | NM_080841    | PTPRA  | Downregulation |
| hsa_circ_00917<br>10 | chrX:151130894-151131115 | Exonic   | - | 221   | 221 | NM_004961    | GABRE  | Upregulation   |
| hsa_circ_00922<br>83 | chr22:36681395-36681695  | Intronic | - | 300   | 300 | NM_002473    | MYH9   | Upregulation   |
| hsa_circ_00626<br>82 | chr22:26936754-26937684  | Exonic   | - | 930   | 930 | NM_001008566 | TPST2  | Upregulation   |
| hsa_circ_00052<br>73 | chr8:141710989-141716304 | Exonic   | - | 5315  | 357 | NM_001199649 | PTK2   | Upregulation   |
| hsa_circ_00327<br>04 | chr14:76173360-76187046  | Exonic   | + | 13686 | 457 | NM_015072    | TLL5   | Upregulation   |
| hsa_circ_00923<br>60 | chr17:27047048-27047688  | Intronic | + | 640   | 640 | NM_000984    | RPL23A | Upregulation   |

|                      |                         |        |   |       |      |              |          |              |
|----------------------|-------------------------|--------|---|-------|------|--------------|----------|--------------|
| hsa_circ_00056<br>99 | chr16:19627435-19663412 | Exonic | + | 35977 | 1198 | NM_020314    | C16orf62 | Upregulation |
| hsa_circ_00043<br>15 | chr16:74491771-74493687 | Exonic | - | 1916  | 229  | NR_027264    | GLG1     | Upregulation |
| hsa_circ_00075<br>03 | chr10:28872327-28884970 | Exonic | + | 12643 | 645  | NR_024557    | WAC      | Upregulation |
| hsa_circ_00434<br>38 | chr17:37583953-37584043 | Exonic | - | 90    | 90   | NM_004774    | MED1     | Upregulation |
| hsa_circ_00066<br>08 | chr10:3160973-3162236   | Exonic | + | 1263  | 241  | NM_001242339 | PFKP     | Upregulation |
| hsa_circ_00005<br>16 | chr14:20811398-20811483 | Exonic | + | 85    | 85   | NR_002312    | RPPH1    | Upregulation |
| hsa_circ_00024<br>04 | chr17:35603741-35609962 | Exonic | - | 6221  | 634  | NM_198839    | ACACA    | Upregulation |
| hsa_circ_00019<br>55 | chr15:64495280-64508912 | Exonic | - | 13632 | 815  | NM_022048    | CSNK1G1  | Upregulation |
| hsa_circ_00068       | chr11:66006274-66006748 | Exonic | + | 474   | 179  | NM_018026    | PACS1    | Upregulation |

|                      |                         |          |   |       |     |           |          |              |
|----------------------|-------------------------|----------|---|-------|-----|-----------|----------|--------------|
| 57                   |                         |          |   |       |     |           |          |              |
| hsa_circ_00005<br>19 | chr14:20811436-20811534 | Exonic   | - | 98    | 98  | NR_002312 | RPPH1    | Upregulation |
| hsa_circ_00087<br>84 | chr13:24164288-24200931 | Exonic   | + | 36643 | 479 | NM_148957 | TNFRSF19 | Upregulation |
| hsa_circ_00019<br>36 | chrX:79962925-79975155  | Exonic   | - | 12230 | 676 | NM_153252 | BRWD3    | Upregulation |
| hsa_circ_00617<br>49 | chr21:40648098-40649277 | Exonic   | - | 1179  | 142 | NM_033656 | BRWD1    | Upregulation |
| hsa_circ_00720<br>88 | chr5:32379220-32388780  | Exonic   | - | 9560  | 693 | NM_016107 | ZFR      | Upregulation |
| hsa_circ_00009<br>81 | chr2:20240809-20240905  | Intronic | - | 96    | 96  | NM_014713 | LAPTM4A  | Upregulation |
| hsa_circ_00417<br>32 | chr17:6350782-6351078   | Exonic   | + | 296   | 296 | NM_019013 | FAM64A   | Upregulation |
| hsa_circ_00005<br>17 | chr14:20811404-20811492 | Exonic   | - | 88    | 88  | NR_002312 | RPPH1    | Upregulation |

|                      |                         |        |   |     |     |           |       |              |
|----------------------|-------------------------|--------|---|-----|-----|-----------|-------|--------------|
| hsa_circ_00005<br>15 | chr14:20811305-20811534 | Exonic | - | 229 | 229 | NR_002312 | RPPH1 | Upregulation |
| hsa_circ_00005<br>12 | chr14:20811282-20811436 | Exonic | - | 154 | 154 | NR_002312 | RPPH1 | Upregulation |
| hsa_circ_00005<br>11 | chr14:20811282-20811431 | Exonic | - | 149 | 149 | NR_002312 | RPPH1 | Upregulation |
| hsa_circ_00005<br>14 | chr14:20811305-20811436 | Exonic | - | 131 | 131 | NR_002312 | RPPH1 | Upregulation |
| hsa_circ_00005<br>18 | chr14:20811404-20811554 | Exonic | - | 150 | 150 | NR_002312 | RPPH1 | Upregulation |
| hsa_circ_00005<br>20 | chr14:20811436-20811559 | Exonic | - | 123 | 123 | NR_002312 | RPPH1 | Upregulation |

<sup>a</sup>logFC|>2.0 and P<0.05. FC, fold-change; circRNA, circular RNA; chr, chromosome; TADA2A, transcriptional adaptor 2A; NOL10, nucleolar protein 10; RPPH1, ribonuclease P RNA component H1; hsa, Homo sapiens.
